# Supplementary material
Source: Springer Nature journal article supplement (https://www.springermedizin.de/resource/supplementary/12885_2014_5177_MOESM4_ESM.pdf/9468490)

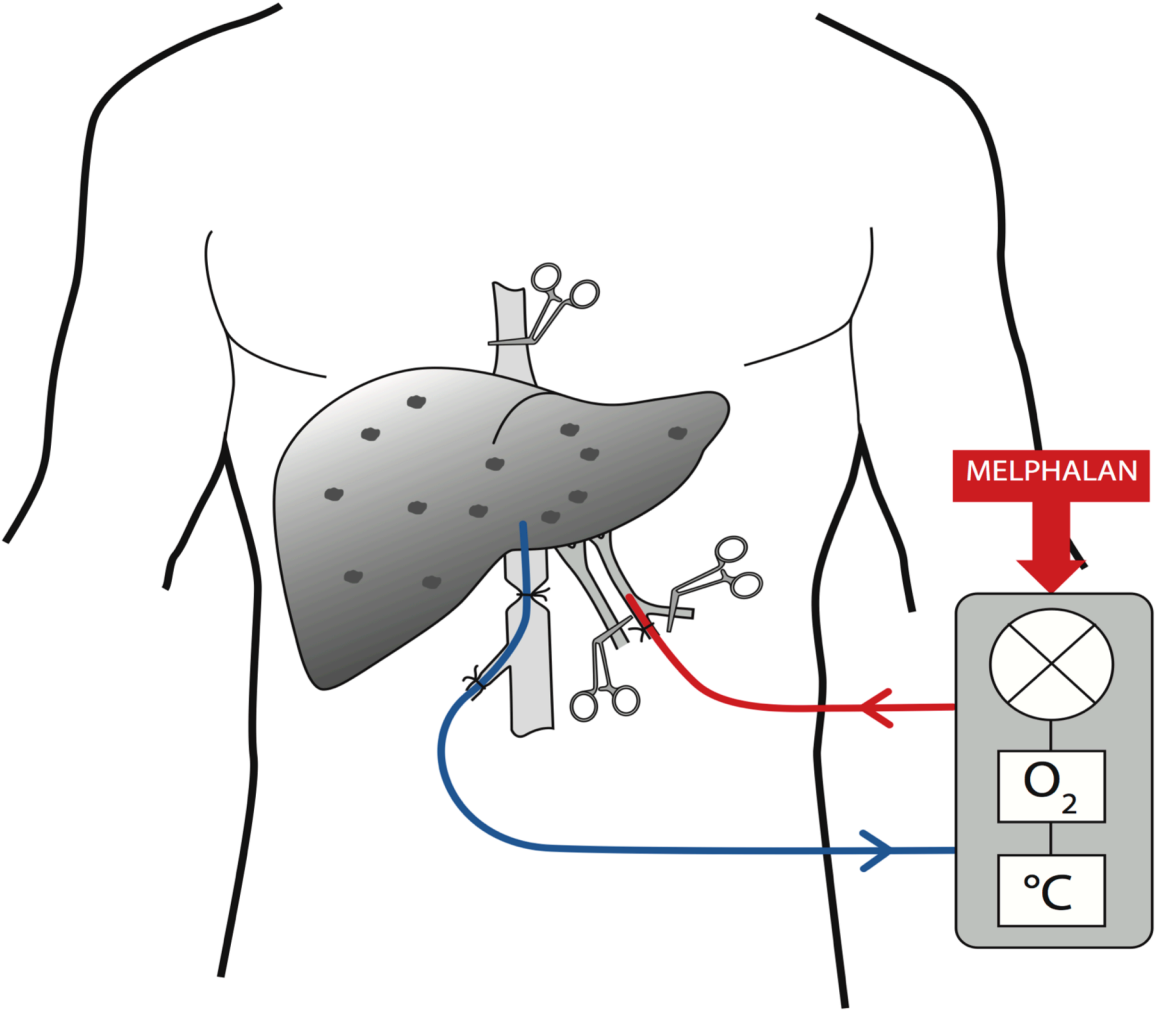

MELPHALAN

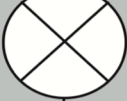

O<sub>2</sub>

°C

Supplement: MOESM4 [file 9468490]
